# Supplementary material for: Nickel-Cadmium-Sulfide Anchored on rGO Nanocomposite for Removal of Textile Industry Dyes
Source: MDPI journal article supplement (doi:10.3390/su142316184), 2022-12-04
Supplement: s1 [file s1]

Archive with 1 entries (1 files):
- sustainability-2017492-supplementary.pdf
