# Supplementary material for: Nickel-Cadmium-Sulfide Anchored on rGO Nanocomposite for Removal of Textile Industry Dyes
Source: MDPI journal article supplement (doi:10.3390/su142316184), 2022-12-04
Supplement: s1 [file s1 › sustainability-2017492-supplementary.pdf]

# Nickel-Cadmium-Sulfide Anchored on rGO Nanocomposite for Removal of Textile Industry Dyes

Narthana Kandhasamy <sup>1</sup>, Govindasamy Murugadoss <sup>1,\*</sup>, Thiruppathi Kannappan <sup>2</sup>, Kamalan Kirubaharan <sup>3</sup> and Rajesh Kumar Manavalan <sup>4</sup>

<sup>1</sup> Centre for Nanoscience and Nanotechnology, Sathyabama Institute of Science and Technology, Chennai 600119, Tamil Nadu, India

<sup>2</sup> Department of Physics, SRM Valliammai Engineering College, SRM Nagar, Kattankulathur 603203, Tamil Nadu, India

<sup>3</sup> Coating Department, Fun Glass–Centre for Functional and Surface Functionalised Glass, Alexander Dubcek University of Trencin, 91150 Trencin, Slovakia

<sup>4</sup> Institute of Natural Science and Mathematics, Ural Federal University, 620002 Yekaterinburg, Russia

\* Correspondence: murugadoss\_g@yahoo.com

## 3.2. FTIR Analysis

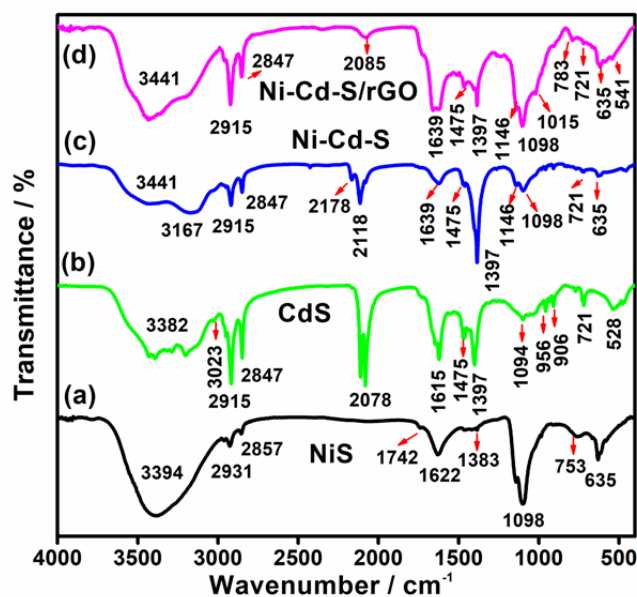

**Figure S1.** FTIR spectra of (a) NiS, (b) CdS, (c) Ni-Cd-S and (d) Ni-Cd-S/rGO nanocomposite.

### 3.6. Photocatalytic Activity

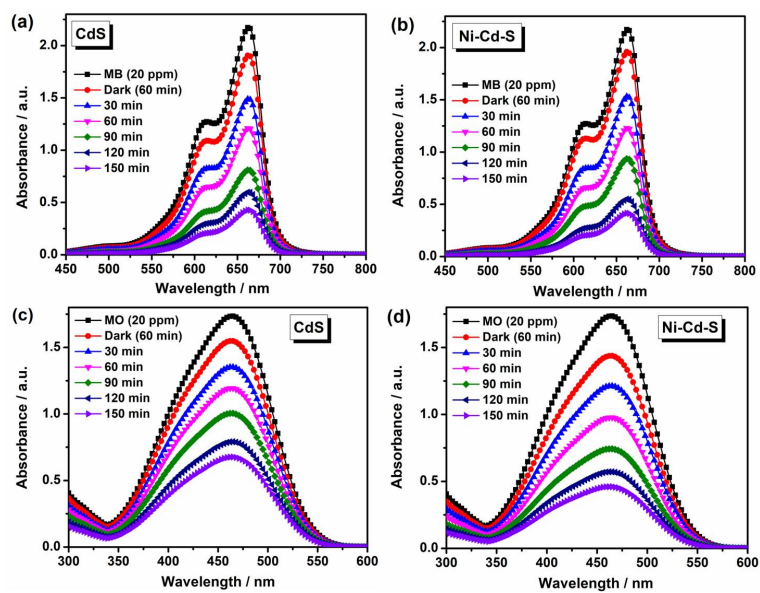

**Figure S2.** The lowest and highest Photocatalytic degradation UV spectrum of (a) CdS, (b) Ni-Cd-S for MB dye and (c) CdS and (d) Ni-Cd-S for MO dye.
